# Supplementary material for: Pheromone independent unisexual development in Cryptococcus neoformans
Source: PLOS journal article supplement (doi:10.1371/journal.pgen.1006772), 2017-05-03

Figure S8

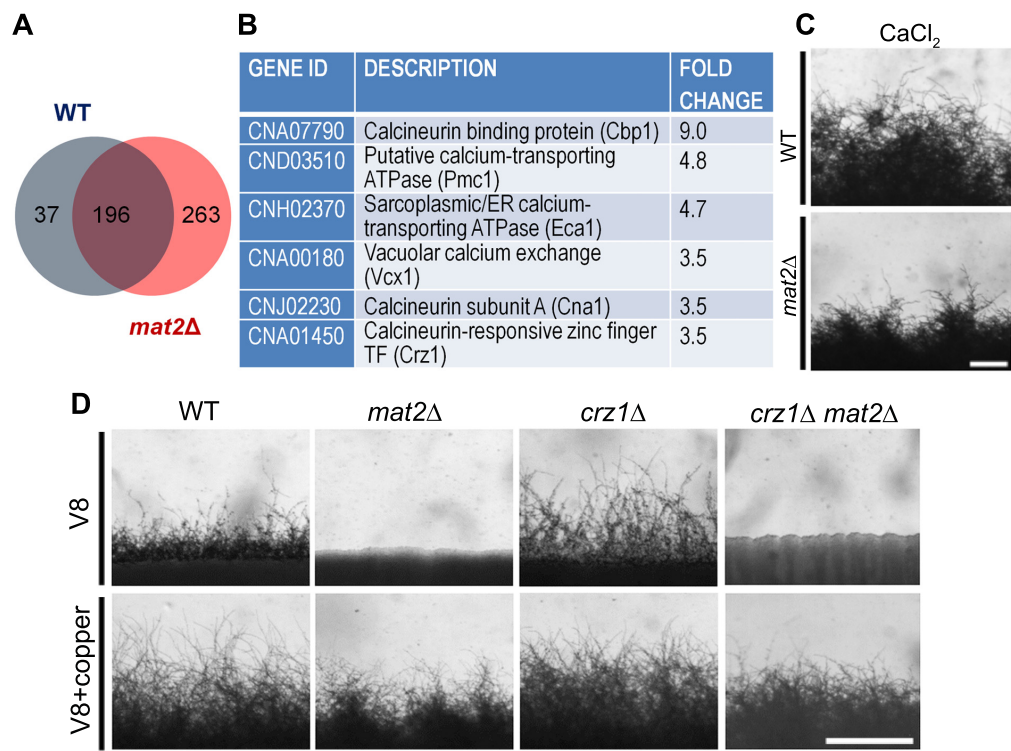

Supplement: S8 (10.1371/journal.pgen.1006772.s008) [file journal.pgen.1006772.s008]
